# Supplementary material
Source: PubMed Central journal article supplement (PMC3294789)
Supplement: supp_194.5.1092_FigS1-S2.pdf [file supp_194.5.1092_FigS1-S2.pdf]

Supplemental figures for

*“Growth and localization of polyhydroxybutyrate granules in Ralstonia eutropha”*

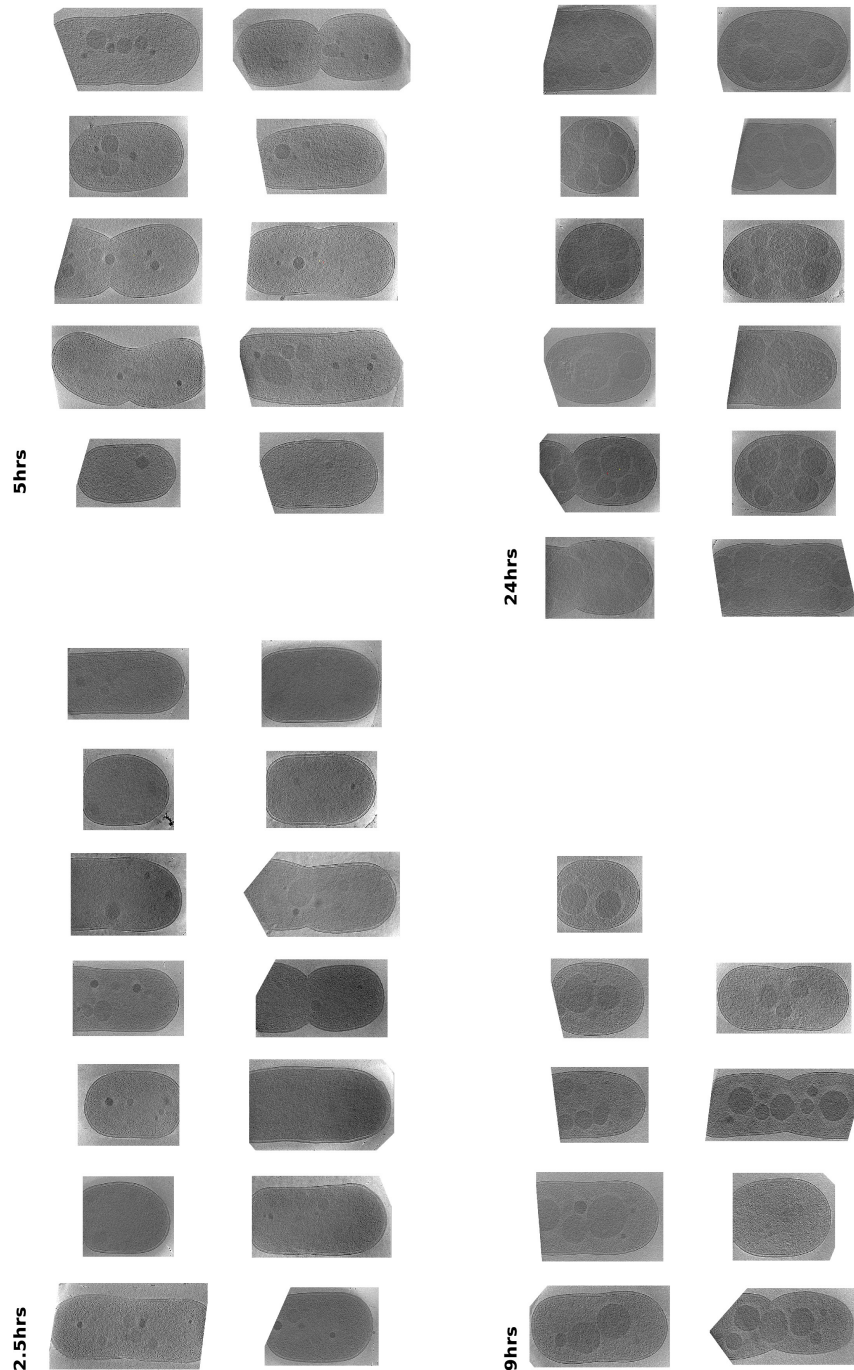

**Figure S1. Slices through all 45 *Ralstonia eutropha* cells.** Note that due to the fact that granules are scattered in 3-D throughout the cell, and tend not to occur on the centerline, these central slices do not accurately convey the number and distribution of granules. Figure 2 represents this data in 3-D to fully illustrate granule distribution.

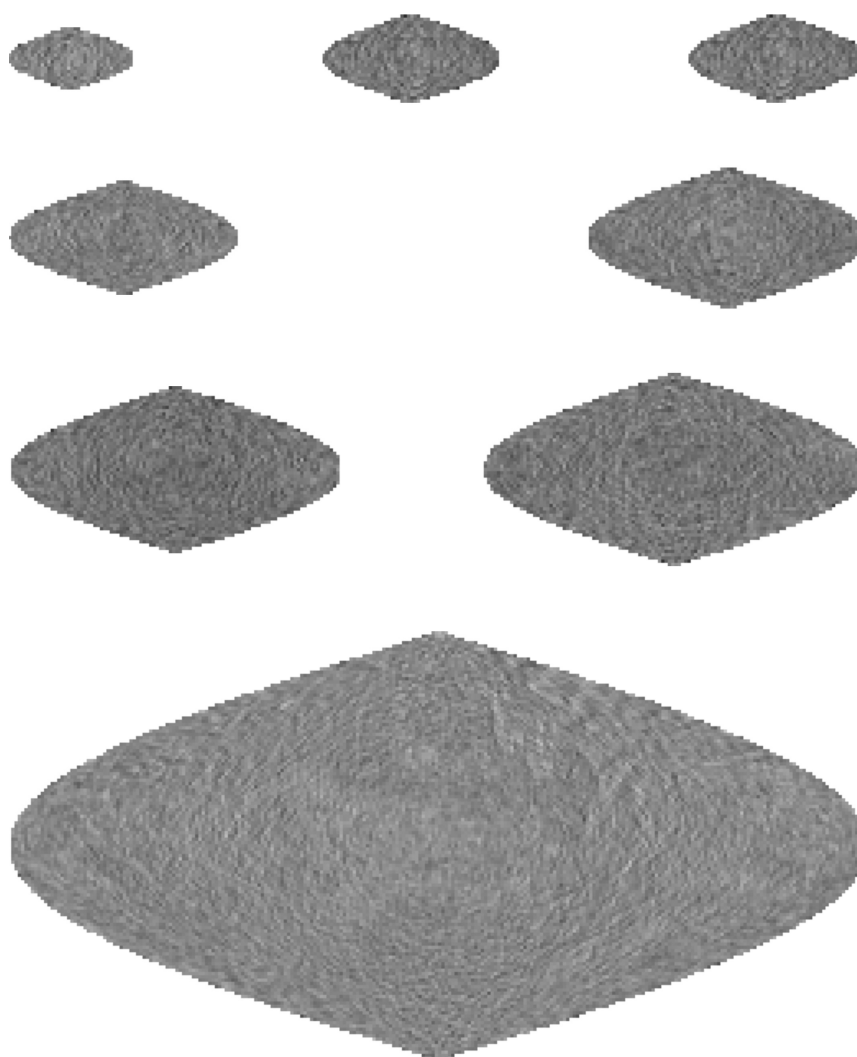

**Figure S2. Sanson-Flamstead projections of the surfaces of representative granules.** Eight arbitrary granules across the range of sizes are depicted to demonstrate the lack of clear surface features.
